# Supplementary material for: Green and Sustainable Mobile Robots Design - a MCDM Approach
Source: Research Square preprint supplement (doi:10.21203/rs.3.rs-930297/v1), 2021-10-20
Supplement: Supplementary file 1 [file 0a7bddd5c4921f8fed8fecc2.xlsx]

## Sheet: Sheet1
							GREEN ROBOT DESIGN - EXAMPLE 1
						Inconsistency	0.05361
											Cost	Energy	Environment	Learning
						Name	Normalized	Idealized		Cost	1	0.333333	0.333333	0.333333
						Cost	0.0958828	0.216416		Energy	3	1	0.5	2
						Energy	0.278296	0.628138		Environment	3	2	1	3
						Environment	0.443049	1		Learning	3	0.5	0.333333	1
						Learning	0.182773	0.412535
							COST
						Inconsistency	0.01215
											B Connector	B Holder	Batteries	Chasis	Controller	Fastening	IOD devives	MD Board	Motors	Sensors	Software	Tyres	Wheels	Wires
						Name	Normalized	Idealized		B Connector	1	1	0.111111	0.25	0.111111	1	0.5	0.125	0.125	0.166667	1	0.5	0.5	0.5
						B Connector	0.0159875	0.0835706		B Holder	1	1	0.111111	0.25	0.111111	1	0.5	0.125	0.125	0.166667	1	0.5	0.5	0.5
						B Holder	0.0159875	0.0835706		Batteries	9.00001	9.00001	1	3	1	9	6	2	2	2	9	9	9	9
						Batteries	0.191305	1		Chasis	4	4	0.333333	1	0.333333	4	2	0.5	0.5	0.5	4	4	4	4
						Chasis	0.0682917	0.356979		Controller	9.00001	9.00001	1	3	1	9	6	2	2	2	9	9	9	9
						Controller	0.191305	1		Fastening	1	1	0.111111	0.25	0.111111	1	0.5	0.125	0.125	0.166667	1	1	1	1
						Fastening	0.0181161	0.0946975		IOD devives	2	2	0.166667	0.5	0.166667	2	1	0.25	0.25	0.333333	2	2	2	2
						IOD devives	0.0347403	0.181597		MD Board	8	8	0.5	2	0.5	8	4	1	1	2	9	9	9	9
						MD Board	0.14476	0.756698		Motors	8	8	0.5	2	0.5	8	4	1	1	2	8	8	8	8
						Motors	0.139241	0.72785		Sensors	5.99999	5.99999	0.5	2	0.5	5.99999	3	0.5	0.5	1	6	6	6	6
						Sensors	0.101634	0.531269		Software	1	1	0.111111	0.25	0.111111	1	0.5	0.111111	0.125	0.166667	1	1	1	1
						Software	0.017975	0.0939599		Tyres	2	2	0.111111	0.25	0.111111	1	0.5	0.111111	0.125	0.166667	1	1	1	1
						Tyres	0.0202191	0.105691		Wheels	2	2	0.111111	0.25	0.111111	1	0.5	0.111111	0.125	0.166667	1	1	1	1
						Wheels	0.0202191	0.105691		Wires	2	2	0.111111	0.25	0.111111	1	0.5	0.111111	0.125	0.166667	1	1	1	1
						Wires	0.0202191	0.105691
						ALTERNATIVES
						Inconsistency	0.01234					A11>A3>A14>A6>A9>A1,A8,A12,A16>A4>A5>A13>A10>A2>A15>A7
						Name	Normalized	Idealized	rank		A1	A2	A3	A4	A5	A6	A7	A8	A9	A10	A11	A12	A13	A14	A15	A16
						A1	0.0622322	0.551644	6	A1	1	2	0.5	1	2	0.5	2	1	1	2	0.5	1	2	0.5	2	1
						A2	0.0359328	0.318518	11	A2	0.5	1	0.5	0.5	0.5	0.5	1	0.5	0.5	1	0.5	0.5	1	0.5	1	0.5
						A3	0.101137	0.896505	2	A3	2	2	1	2	2	1	3	2	2	2	1	2	2	1	3	2
						A4	0.0547389	0.485221	7	A4	1	2	0.5	1	1	0.5	2	1	0.5	2	0.5	1	1	0.5	2	1
						A5	0.0448549	0.397606	8	A5	0.5	2	0.5	1	1	0.5	2	0.5	0.5	1	0.5	0.5	1	0.5	2	0.5
						A6	0.093398	0.827906	4	A6	2	2	1	2	2	1	3	2	1	2	0.5	2	2	1	3	2
						A7	0.0297895	0.264062	13	A7	0.5	1	0.333333	0.5	0.5	0.333333	1	0.5	0.333333	1	0.333333	0.5	0.5	0.333333	1	0.5
						A8	0.0622322	0.551644	6	A8	1	2	0.5	1	2	0.5	2	1	1	2	0.5	1	2	0.5	2	1
						A9	0.0702503	0.622718	5	A9	1	2	0.5	2	2	1	3	1	1	2	0.5	1	2	0.5	2	1
						A10	0.0373031	0.330665	10	A10	0.5	1	0.5	0.5	1	0.5	1	0.5	0.5	1	0.5	0.5	1	0.5	1	0.5
						A11	0.112812	1	1	A11	2	2	1	2	2	2	3	2	2	2	1	2	2	2	3	2
						A12	0.0622322	0.551644	6	A12	1	2	0.5	1	2	0.5	2	1	1	2	0.5	1	2	0.5	2	1
						A13	0.0426594	0.378145	9	A13	0.5	1	0.5	1	1	0.5	2	0.5	0.5	1	0.5	0.5	1	0.5	2	0.5
						A14	0.0976903	0.865954	3	A14	2	2	1	2	2	1	3	2	2	2	0.5	2	2	1	3	2
						A15	0.0305049	0.270404	12	A15	0.5	1	0.333333	0.5	0.5	0.333333	1	0.5	0.5	1	0.333333	0.5	0.5	0.333333	1	0.5
						A16	0.0622322	0.551644	6	A16	1	2	0.5	1	2	0.5	2	1	1	2	0.5	1	2	0.5	2	1
							ENERGY
						Inconsistency	0.01465
											B Connector	B Holder	Batteries	Chasis	Controller	Fastening	IOD devives	MD Board	Motors	Sensors	Software	Tyres	Wheels	Wires
						Name	Normalized	Idealized		B Connector	1	2	0.111111	2	0.125	2	0.25	0.25	0.125	0.25	0.5	2	2	0.5
						B Connector	0.0242004	0.111148		B Holder	0.5	1	0.111111	1	0.111111	1	0.125	0.125	0.111111	0.125	0.25	1	1	0.25
						B Holder	0.013963	0.0641295		Batteries	9.00001	9.00001	1	9	2	9	3	3	2	3	6	9	9	6
						Batteries	0.217732	1		Chasis	0.5	1	0.111111	1	0.125	1	0.125	0.125	0.111111	0.125	0.25	1	1	0.25
						Chasis	0.0141043	0.0647786		Controller	8	9.00001	0.5	8	1	9	2	1	1	2	4	9	9	4
						Controller	0.145496	0.668236		Fastening	0.5	1	0.111111	1	0.111111	1	0.125	0.125	0.111111	0.125	0.25	1	1	0.25
						Fastening	0.013963	0.0641295		IOD devives	4	8	0.333333	8	0.5	8	1	1	0.5	1	2	9	9	2
						IOD devives	0.0970356	0.445666		MD Board	4	8	0.333333	8	1	8	1	1	0.5	1	2	9	9	2
						MD Board	0.102123	0.469033		Motors	8	9.00001	0.5	9.00001	1	9.00001	2	2	1	2	4	9	9	4
						Motors	0.153624	0.705568		Sensors	4	8	0.333333	8	0.5	8	1	1	0.5	1	2	8	8	2
						Sensors	0.0951097	0.436821		Software	2	4	0.166667	4	0.25	4	0.5	0.5	0.25	0.5	1	4	4	1
						Software	0.0475548	0.21841		Tyres	0.5	1	0.111111	1	0.111111	1	0.111111	0.111111	0.111111	0.125	0.25	1	1	0.25
						Tyres	0.0137696	0.0632411		Wheels	0.5	1	0.111111	1	0.111111	1	0.111111	0.111111	0.111111	0.125	0.25	1	1	0.25
						Wheels	0.0137696	0.0632411		Wires	2	4	0.166667	4	0.25	4	0.5	0.5	0.25	0.5	1	4	4	1
						Wires	0.0475548	0.21841
						ALTERNATIVES
						Inconsistency	0					A2,A4,A5,A7,A10,A12,A13,A15>A1,A3,A6,A8,A9,A11,A14,A16
						Name	Normalized	Idealized	RANK		A1	A2	A3	A4	A5	A6	A7	A8	A9	A10	A11	A12	A13	A14	A15	A16
						A1	0.0416667	0.5	2	A1	1	0.5	1	0.5	0.5	1	0.5	1	1	0.5	1	0.5	0.5	1	0.5	1
						A2	0.0833333	1	1	A2	2	1	2	1	1	2	1	2	2	1	2	1	1	2	1	2
						A3	0.0416667	0.5	2	A3	1	0.5	1	0.5	0.5	1	0.5	1	1	0.5	1	0.5	0.5	1	0.5	1
						A4	0.0833333	1	1	A4	2	1	2	1	1	2	1	2	2	1	2	1	1	2	1	2
						A5	0.0833333	1	1	A5	2	1	2	1	1	2	1	2	2	1	2	1	1	2	1	2
						A6	0.0416667	0.5	2	A6	1	0.5	1	0.5	0.5	1	0.5	1	1	0.5	1	0.5	0.5	1	0.5	1
						A7	0.0833333	1	1	A7	2	1	2	1	1	2	1	2	2	1	2	1	1	2	1	2
						A8	0.0416667	0.5	2	A8	1	0.5	1	0.5	0.5	1	0.5	1	1	0.5	1	0.5	0.5	1	0.5	1
						A9	0.0416667	0.5	2	A9	1	0.5	1	0.5	0.5	1	0.5	1	1	0.5	1	0.5	0.5	1	0.5	1
						A10	0.0833333	1	1	A10	2	1	2	1	1	2	1	2	2	1	2	1	1	2	1	2
						A11	0.0416667	0.5	2	A11	1	0.5	1	0.5	0.5	1	0.5	1	1	0.5	1	0.5	0.5	1	0.5	1
						A12	0.0833333	1	1	A12	2	1	2	1	1	2	1	2	2	1	2	1	1	2	1	2
						A13	0.0833333	1	1	A13	2	1	2	1	1	2	1	2	2	1	2	1	1	2	1	2
						A14	0.0416667	0.5	2	A14	1	0.5	1	0.5	0.5	1	0.5	1	1	0.5	1	0.5	0.5	1	0.5	1
						A15	0.0833333	1	1	A15	2	1	2	1	1	2	1	2	2	1	2	1	1	2	1	2
						A16	0.0416667	0.5	2	A16	1	0.5	1	0.5	0.5	1	0.5	1	1	0.5	1	0.5	0.5	1	0.5	1
							ENVIRONMENT
						Inconsistency	0.00046
											B Connector	B Holder	Batteries	Chasis	Controller	Fastening	IOD devives	MD Board	Motors	Sensors	Software	Tyres	Wheels	Wires
						Name	Normalized	Idealized		B Connector	1	1	0.166667	1	0.5	1	0.5	0.5	0.25	0.5	0.25	0.5	0.5	0.5
						B Connector	0.0311228	0.159231		B Holder	1	1	0.166667	1	0.5	1	0.5	0.5	0.25	0.5	0.25	0.5	0.5	0.5
						B Holder	0.0311228	0.159231		Batteries	5.99999	5.99999	1	6	3	6	3	3	2	3	2	3	3	3
						Batteries	0.195457	1		Chasis	1	1	0.166667	1	0.5	1	0.5	0.5	0.25	0.5	0.25	0.5	0.5	0.5
						Chasis	0.0311228	0.159231		Controller	2	2	0.333333	2	1	2	1	1	0.5	1	0.5	1	1	1
						Controller	0.0622456	0.318462		Fastening	1	1	0.166667	1	0.5	1	0.5	0.5	0.25	0.5	0.25	0.5	0.5	0.5
						Fastening	0.0311228	0.159231		IOD devives	2	2	0.333333	2	1	2	1	1	0.5	1	0.5	1	1	1
						IOD devives	0.0622456	0.318462		MD Board	2	2	0.333333	2	1	2	1	1	0.5	1	0.5	1	1	1
						MD Board	0.0622456	0.318462		Motors	4	4	0.5	4	2	4	2	2	1	2	1	2	2	2
						Motors	0.122166	0.625027		Sensors	2	2	0.333333	2	1	2	1	1	0.5	1	0.5	1	1	1
						Sensors	0.0622456	0.318462		Software	4	4	0.5	4	2	4	2	2	1	2	1	2	2	2
						Software	0.122166	0.625027		Tyres	2	2	0.333333	2	1	2	1	1	0.5	1	0.5	1	1	1
						Tyres	0.0622456	0.318462		Wheels	2	2	0.333333	2	1	2	1	1	0.5	1	0.5	1	1	1
						Wheels	0.0622456	0.318462		Wires	2	2	0.333333	2	1	2	1	1	0.5	1	0.5	1	1	1
						Wires	0.0622456	0.318462
						ALTERNATIVES						A1>A2,A3,A9>A4,A8,A10,A11>A16,A7,A12>A6>A14,A15>A5>A13
						Inconsistency	0.00694
											A1	A2	A3	A4	A5	A6	A7	A8	A9	A10	A11	A12	A13	A14	A15	A16
						Name	Normalized	Idealized	rank	A1	1	1	1	2	3	2	2	2	1	2	2	2	6	3	3	2
						A1	0.109926	1	1	A2	1	1	1	1	3	2	2	1	1	1	1	2	5	3	3	2
						A2	0.0921626	0.838408	2	A3	1	1	1	1	3	2	2	1	1	1	1	2	5	3	3	2
						A3	0.0921626	0.838408	2	A4	0.5	1	1	1	2	1	1	1	1	1	1	1	4	2	2	1
						A4	0.0675929	0.614896	3	A5	0.333333	0.333333	0.333333	0.5	1	0.5	0.5	0.5	0.333333	0.5	0.5	0.5	2	1	1	0.5
						A5	0.0315182	0.286723	7	A6	0.5	0.5	0.5	1	2	1	1	1	0.5	1	1	1	3	1	1	1
						A6	0.0538878	0.490221	5	A7	0.5	0.5	0.5	1	2	1	1	1	0.5	1	1	1	3	2	2	1
						A7	0.0579827	0.527472	4	A8	0.5	1	1	1	2	1	1	1	1	1	1	1	4	2	2	1
						A8	0.0675929	0.614896	3	A9	1	1	1	1	3	2	2	1	1	1	1	2	5	3	3	2
						A9	0.0921626	0.838408	2	A10	0.5	1	1	1	2	1	1	1	1	1	1	1	4	2	2	1
						A10	0.0675929	0.614896	3	A11	0.5	1	1	1	2	1	1	1	1	1	1	1	4	2	2	1
						A11	0.0675929	0.614896	3	A12	0.5	0.5	0.5	1	2	1	1	1	0.5	1	1	1	3	2	2	1
						A12	0.0579827	0.527472	4	A13	0.166667	0.2	0.2	0.25	0.5	0.333333	0.333333	0.25	0.2	0.25	0.25	0.333333	1	0.5	0.5	0.333333
						A13	0.0174994	0.159193	8	A14	0.333333	0.333333	0.333333	0.5	1	1	0.5	0.5	0.333333	0.5	0.5	0.5	2	1	1	0.5
						A14	0.0331808	0.301848	6	A15	0.333333	0.333333	0.333333	0.5	1	1	0.5	0.5	0.333333	0.5	0.5	0.5	2	1	1	0.5
						A15	0.0331808	0.301848	6	A16	0.5	0.5	0.5	1	2	1	1	1	0.5	1	1	1	3	2	2	1
						A16	0.0579827	0.527472	4
							LEARNING
						Inconsistency	0.00205
						Name	Normalized	Idealized
						B Connector	0.0240556	0.112977			B Connector	B Holder	Batteries	Chasis	Controller	Fastening	IOD devives	MD Board	Motors	Sensors	Software	Tyres	Wheels	Wires
						B Holder	0.0240556	0.112977		B Connector	1	1	0.5	1	0.166667	1	0.25	0.166667	0.5	0.166667	0.125	1	1	1
						Batteries	0.0481113	0.225954		B Holder	1	1	0.5	1	0.166667	1	0.25	0.166667	0.5	0.166667	0.125	1	1	1
						Chasis	0.0240556	0.112977		Batteries	2	2	1	2	0.333333	2	0.5	0.333333	1	0.333333	0.25	2	2	2
						Controller	0.143787	0.675294		Chasis	1	1	0.5	1	0.166667	1	0.25	0.166667	0.5	0.166667	0.125	1	1	1
						Fastening	0.0240556	0.112977		Controller	5.99999	5.99999	3	5.99999	1	6	2	1	3	1	0.5	6	6	6
						IOD devives	0.0911026	0.427863		Fastening	1	1	0.5	1	0.166667	1	0.25	0.166667	0.5	0.166667	0.125	1	1	1
						MD Board	0.143787	0.675294		IOD devives	4	4	2	4	0.5	4	1	0.5	2	0.5	0.5	4	4	4
						Motors	0.0481113	0.225954		MD Board	5.99999	5.99999	3	5.99999	1	5.99999	2	1	3	1	0.5	6	6	6
						Sensors	0.143787	0.675294		Motors	2	2	1	2	0.333333	2	0.5	0.333333	1	0.333333	0.25	2	2	2
						Software	0.212925	1		Sensors	5.99999	5.99999	3	5.99999	1	5.99999	2	1	3	1	0.5	6	6	6
						Tyres	0.0240556	0.112977		Software	8	8	4	8	2	8	2	2	4	2	1	8	8	8
						Wheels	0.0240556	0.112977		Tyres	1	1	0.5	1	0.166667	1	0.25	0.166667	0.5	0.166667	0.125	1	1	1
						Wires	0.0240556	0.112977		Wheels	1	1	0.5	1	0.166667	1	0.25	0.166667	0.5	0.166667	0.125	1	1	1
										Wires	1	1	0.5	1	0.166667	1	0.25	0.166667	0.5	0.166667	0.125	1	1	1
						ALTERNATIVES
						Inconsistency	0.00731								A9>A1,A10,A11>A2,A3,A12,A16>A4>A8,A14,A15>A13>A6,A7>A5
						Name	Normalized	Idealized	rank		A1	A2	A3	A4	A5	A6	A7	A8	A9	A10	A11	A12	A13	A14	A15	A16
						A1	0.0921947	0.838404	2	A1	1	1	1	2	5	3	3	2	1	1	1	1	3	2	2	1
						A2	0.0676672	0.615355	3	A2	1	1	1	1	4	2	2	1	0.5	1	1	1	2	1	1	1
						A3	0.0676672	0.615355	3	A3	1	1	1	1	4	2	2	1	0.5	1	1	1	2	1	1	1
						A4	0.0580602	0.52799	4	A4	0.5	1	1	1	3	2	2	1	0.5	0.5	0.5	1	2	1	1	1
						A5	0.0175051	0.159188	8	A5	0.2	0.25	0.25	0.333333	1	0.5	0.5	0.333333	0.166667	0.2	0.2	0.25	0.5	0.333333	0.333333	0.25
						A6	0.0315561	0.286966	7	A6	0.333333	0.5	0.5	0.5	2	1	1	0.5	0.333333	0.333333	0.333333	0.5	1	0.5	0.5	0.5
						A7	0.0315561	0.286966	7	A7	0.333333	0.5	0.5	0.5	2	1	1	0.5	0.333333	0.333333	0.333333	0.5	1	0.5	0.5	0.5
						A8	0.0557961	0.507401	5	A8	0.5	1	1	1	3	2	2	1	0.5	0.5	0.5	1	1	1	1	1
						A9	0.109965	1	1	A9	1	2	2	2	5.99999	3	3	2	1	1	1	2	3	2	2	2
						A10	0.0921947	0.838404	2	A10	1	1	1	2	5	3	3	2	1	1	1	1	3	2	2	1
						A11	0.0921947	0.838404	2	A11	1	1	1	2	5	3	3	2	1	1	1	1	3	2	2	1
						A12	0.0676672	0.615355	3	A12	1	1	1	1	4	2	2	1	0.5	1	1	1	2	1	1	1
						A13	0.036717	0.333899	6	A13	0.333333	0.5	0.5	0.5	2	1	1	1	0.333333	0.333333	0.333333	0.5	1	1	1	0.5
						A14	0.0557961	0.507401	5	A14	0.5	1	1	1	3	2	2	1	0.5	0.5	0.5	1	1	1	1	1
						A15	0.0557961	0.507401	5	A15	0.5	1	1	1	3	2	2	1	0.5	0.5	0.5	1	1	1	1	1
						A16	0.0676672	0.615355	3	A16	1	1	1	1	4	2	2	1	0.5	1	1	1	2	1	1	1
							BATTERY CONNECTOR
						Inconsistency	0
											Metal BC	Plastic BC
						Name	Normalized	Idealized		Metal BC	1	3
						Metal BC	0.75	1		Plastic BC	0.333333	1
						Plastic BC	0.25	0.333333
							BATTERY HOLDER
						Inconsistency	0
											Metal BH	Plastic BH
						Name	Normalized	Idealized		Metal BH	1	3
						Metal BH	0.75	1		Plastic BH	0.333333	1
						Plastic BH	0.25	0.333333
							BATTERY
						Inconsistency	0				Eco-Energy saving	Ordinary battery
										Eco-Energy saving	1	5
						Name	Normalized	Idealized		Ordinary battery	0.2	1
						Eco-Energy saving	0.833333	1
						Ordinary battery	0.166667	0.2
							CHASIS
						Inconsistency	0
											Acrylic	Metal chasis
						Name	Normalized	Idealized		Acrylic	1	0.5
						Acrylic	0.333333	0.5		Metal chasis	2	1
						Metal chasis	0.666667	1
							CONTROLLER
						Inconsistency	0
											Arduino	Microcontroller
						Name	Normalized	Idealized		Arduino	1	4
						Arduino	0.8	1		Microcontroller	0.25	1
						Microcontroller	0.2	0.25
							FASTENERS
						Inconsistency	0
											Metal FS	Plastic FS
						Name	Normalized	Idealized		Metal FS	1	3
						Metal FS	0.75	1		Plastic FS	0.333333	1
						Plastic FS	0.25	0.333333
							I/O DEVICES
						Inconsistency	0
											CRT	LED
						Name	Normalized	Idealized		CRT	1	0.25
						CRT	0.2	0.25		LED	4	1
						LED	0.8	1
							MOTOR DRIVER BOARD
						Inconsistency	0
											Eco-energy optim	normal
						Name	Normalized	Idealized		Eco-energy optim	1	4
						Eco-energy optim	0.8	1		normal	0.25	1
						normal	0.2	0.25
							MOTORS
						Inconsistency	0
											DC	Stepper
						Name	Normalized	Idealized		DC	1	0.333333
						DC	0.25	0.333333		Stepper	3	1
						Stepper	0.75	1
							SENSORS
						Inconsistency	0				IR	Ultrasonic
										IR	1	0.5
						Name	Normalized	Idealized		Ultrasonic	2	1
						IR	0.333333	0.5
						Ultrasonic	0.666667	1
							SOFTWARE
						Inconsistency	0
											Arduino software	Microcontroller code
						Name	Normalized	Idealized		Arduino software	1	4
						Arduino software	0.8	1		Microcontroller code	0.25	1
						Microcontroller code	0.2	0.25
							TYRES
						Inconsistency	0				Rubber	Wood
										Rubber	1	0.25
						Name	Normalized	Idealized		Wood	4	1
						Rubber	0.2	0.25
						Wood	0.8	1
							WHEELS
						Inconsistency	0
											Metal	Plastic
						Name	Normalized	Idealized		Metal	1	4
						Metal	0.8	1		Plastic	0.25	1
						Plastic	0.2	0.25
							WIRES
						Inconsistency	0
											Energy saving	Ordinary
						Name	Normalized	Idealized		Energy saving	1	4
						Energy saving	0.8	1		Ordinary	0.25	1
						Ordinary	0.2	0.25
							PRIORITIES
						Name	Normalized By Cluster	Limiting
						B Connector	0.02645	0.005291
						B Holder	0.0236	0.004721
						Batteries	0.17432	0.034865
						Chasis	0.02866	0.005732
						Controller	0.11269	0.022538
						Fastening	0.02381	0.004762
						IOD devives	0.07456	0.014913
						MD Board	0.09616	0.019232
						Motors	0.11902	0.023805
						Sensors	0.09007	0.018014
						Software	0.108	0.0216
						Tyres	0.03774	0.007549
						Wheels	0.03774	0.007549
						Wires	0.04715	0.00943
						Eco-Energy saving	0.83333	0.029055
						Ordinary battery	0.16667	0.005811
						Metal BC	0.74995	0.003968
						Plastic BC	0.25005	0.001323
						Metal BH	0.75005	0.003541
						Plastic BH	0.24995	0.00118
						Acrylic	0.33339	0.001911
						Metal chasis	0.66661	0.003821
						Arduino	0.79999	0.018031
						Microcontroller	0.20001	0.004508
						Cost	0.09588	0.038353
						Energy	0.2783	0.111318
						Environment	0.44305	0.177219
						Learning	0.18277	0.073109
						CRT	0.20003	0.002983
						LED	0.79997	0.01193
						Metal FS	0.75005	0.003571
						Plastic FS	0.24995	0.00119
						GREEN ROBOT DESIGN	0	0
						Eco-energy optim	0.80001	0.015385
						normal	0.19999	0.003846
						DC	0.25	0.005951
						Stepper	0.75	0.017853
						IR	0.33333	0.006005
						Ultrasonic	0.66667	0.01201
						Arduino software	0.8	0.01728
						Microcontroller code	0.2	0.00432
						Rubber	0.20003	0.00151
						Wood	0.79997	0.006039
						Metal	0.79997	0.006039
						Plastic	0.20003	0.00151
						Energy saving	0.8	0.007544
						Ordinary	0.2	0.001886
						A1	0.08312	0.016623
						A2	0.07984	0.015967									A1	A2	A3	A4	A5	A6	A7	A8	A9	A10	A11	A12	A13	A14	A15	A16
						A3	0.0745	0.014899								A1	0.08312	0.08312	0.08312	0.08312	0.08312	0.08312	0.08312	0.08312	0.08312	0.08312	0.08312	0.08312	0.08312	0.08312	0.08312	0.08312
						A4	0.069	0.0138								A2	0.07984	0.07984	0.07984	0.07984	0.07984	0.07984	0.07984	0.07984	0.07984	0.07984	0.07984	0.07984	0.07984	0.07984	0.07984	0.07984
						A5	0.04466	0.008931								A3	0.0745	0.0745	0.0745	0.0745	0.0745	0.0745	0.0745	0.0745	0.0745	0.0745	0.0745	0.0745	0.0745	0.0745	0.0745	0.0745
						A6	0.0502	0.010039								A4	0.069	0.069	0.069	0.069	0.069	0.069	0.069	0.069	0.069	0.069	0.069	0.069	0.069	0.069	0.069	0.069
						A7	0.05751	0.011501								A5	0.04466	0.04466	0.04466	0.04466	0.04466	0.04466	0.04466	0.04466	0.04466	0.04466	0.04466	0.04466	0.04466	0.04466	0.04466	0.04466
						A8	0.05771	0.011542								A6	0.0502	0.0502	0.0502	0.0502	0.0502	0.0502	0.0502	0.0502	0.0502	0.0502	0.0502	0.0502	0.0502	0.0502	0.0502	0.0502
						A9	0.07926	0.015852								A7	0.05751	0.05751	0.05751	0.05751	0.05751	0.05751	0.05751	0.05751	0.05751	0.05751	0.05751	0.05751	0.05751	0.05751	0.05751	0.05751
						A10	0.07357	0.014713								A8	0.05771	0.05771	0.05771	0.05771	0.05771	0.05771	0.05771	0.05771	0.05771	0.05771	0.05771	0.05771	0.05771	0.05771	0.05771	0.05771
						A11	0.06921	0.013842								A9	0.07926	0.07926	0.07926	0.07926	0.07926	0.07926	0.07926	0.07926	0.07926	0.07926	0.07926	0.07926	0.07926	0.07926	0.07926	0.07926
						A12	0.06722	0.013443								A10	0.07357	0.07357	0.07357	0.07357	0.07357	0.07357	0.07357	0.07357	0.07357	0.07357	0.07357	0.07357	0.07357	0.07357	0.07357	0.07357
						A13	0.04175	0.008349								A11	0.06921	0.06921	0.06921	0.06921	0.06921	0.06921	0.06921	0.06921	0.06921	0.06921	0.06921	0.06921	0.06921	0.06921	0.06921	0.06921
						A14	0.04586	0.009172								A12	0.06722	0.06722	0.06722	0.06722	0.06722	0.06722	0.06722	0.06722	0.06722	0.06722	0.06722	0.06722	0.06722	0.06722	0.06722	0.06722
						A15	0.05102	0.010203								A13	0.04175	0.04175	0.04175	0.04175	0.04175	0.04175	0.04175	0.04175	0.04175	0.04175	0.04175	0.04175	0.04175	0.04175	0.04175	0.04175
						A16	0.05562	0.011124								A14	0.04586	0.04586	0.04586	0.04586	0.04586	0.04586	0.04586	0.04586	0.04586	0.04586	0.04586	0.04586	0.04586	0.04586	0.04586	0.04586
																A15	0.05102	0.05102	0.05102	0.05102	0.05102	0.05102	0.05102	0.05102	0.05102	0.05102	0.05102	0.05102	0.05102	0.05102	0.05102	0.05102
																A16	0.05562	0.05562	0.05562	0.05562	0.05562	0.05562	0.05562	0.05562	0.05562	0.05562	0.05562	0.05562	0.05562	0.05562	0.05562	0.05562
